# Supplementary material for: A specialized flavone biosynthetic pathway has evolved in the medicinal plant, Scutellaria baicalensis
Source: PubMed Central journal article supplement — Sci Adv. 2016 Apr 8;2(4):e1501780. doi: 10.1126/sciadv.1501780 (PMC4846459; doi:10.1126/sciadv.1501780), 2016-04-08
Supplement: 1501780_SM.pdf [file 1501780_SM.pdf]

## Supplementary Materials for

### **A specialized flavone biosynthetic pathway has evolved in the medicinal plant, *Scutellaria baicalensis***

Qing Zhao, Yang Zhang, Gang Wang, Lionel Hill, Jing-Ke Weng, Xiao-Ya Chen, Hongwei Xue, Cathie Martin

Published 8 April 2016, *Sci. Adv.* **2**, e1501780 (2016)  
DOI: 10.1126/sciadv.1501780

#### **The PDF file includes:**

- Fig. S1. Multiple alignment of CPY93B6, CPY93B24, and CPY93B25.
- Fig. S2. Flavone accumulation patterns in *S. baicalensis*.
- Fig. S3. RNAi of *SbFNSII-2* in hairy root cultures of *S. baicalensis*.
- Fig. S4. In vitro assay of *SbFNSII-1* and *SbFNSII-2* and in vivo assay of *SbFNSII-2*.
- Fig. S5. HPLC metabolite profiles of *Arabidopsis* plants carrying empty vector or a representative *SbFNSII-2* line, grown on MS with or without supplementation of pinocembrin.
- Fig. S6. Western blot analysis of the recombinant *SbCLLs* and SPB domain analysis of *At4CLs* and *SbCLL-7*.
- Fig. S7. Metabolite profiles by HPLC from empty vector line and a representative *SbCLL-7* RNAi line.
- Fig. S8. Metabolite profiles of HPLC analysis of infiltrated *N. benthamiana* leaves.
- Fig. S9. Transcript levels of *SbC4H* relative to actin.
- Table S1. Primers used in this study. Underlined sequences mean recombination sites for Gateway cloning.

## Supplementary Information

```
CYP93B6 -----MALYAALFLLSAAVRSVLDRKR-GRPPYPPGPFPLPIIIGHLHLLGPRLHQTFFHD
SbFNSII-1 MDLVEVTLYAALFLLSAAFLLLIFAGDR-SSP---PGPFPLPIIIGHLHLLGPKLHQSFHG
SbFNSII-2 ---MEVTLNVALLLL SAAVCLMVFTGKRRRRLPNPPGPFPLPLIGNLNLVSPRLHHTFFHM
          :.* .**:*:*:*:*:*  : : *          *****:**:*:*:*:*:*:*:*

CYP93B6 LSQRYGPLMQRLGSIKRVIAASPELAKECLKTHELVFSSRKHSTDAIDIVTYDSSFAFSP
SbFNSII-1 LSQRHGPLMQIRLGSINCVVASTPELAKEFLKTNELVFSSRKHSTDAIDIVTYNSSFASFSP
SbFNSII-2 LAQRYGPIMKFRLGSIKRVIAASPELAKECLKTHELVFSSRKHSTDAIDIVTYGVSFASFSP
          *.*:*:*:*:*:*:*:* *:*:*:*:*:*:*:* *:*:*:*:*:*:* *:*:*:*:*:*:*

CYP93B6 YGPYWKFIKKLCTYELLGARNLAHFQPIRTLEVKSFLQILMRKGESGESFNVTEELVKLT
SbFNSII-1 YGPYWKYIKKLCTYELLGARNLHHFQPIRTFEVHTFLRLLMEKSEGESFNVTEELIKLT
SbFNSII-2 YGPYWKYIKKLCTYELLGSRMLNHFEPLRALEVRFLKDVMMAMGKAGKSFNVTEELMKLT
          *****:*:*:*:*:*:*:* * * *:*:*:*:*:*:* *:*:*:*:*:*:*

CYP93B6 SNVISHMMLSIRCSETESEAEAAARTVIREVTQIFGEFVDVSDIIWLCKNFDFQGIKRSKED
SbFNSII-1 SNVMSNMMLGTRCSATDGEAEAAARTVIREVTEIFGEFDAADIIWFCKNFDLQGIKRSKED
SbFNSII-2 SNVMSNMMLSIRAAESEEQAEVARTLIREVSQLFGEFDFGDMFLWFKSFDQGIKRSKED
          ***:*:*:*:* * : : : * * * * * * * * * * * * * * * * * * * * * * *

CYP93B6 IQRRYDALLEKIITDREKQRRTHGGGGGGGEAKDFLDMFLDIMESGKAEVKFTREHLKAL
SbFNSII-1 IQRRYDALLEKIITDREKLRRSHRGG----EAKDFLDIFLDIMDSGNSEVKFSREHLKAL
SbFNSII-2 IKVRYDALLEKILTDRENVRQNGV----EPKDMLDMFLDIMEGGKTDFEFTREHLKAV
          * : * * * * * * * * * * * * * * * * * * * * * * * * * * * * *

CYP93B6 ILDFFTAGTDTTAIVCEWAIAEVINNPVNLKKAQEEIANIVGFDRILQESDAPNLPYLQA
SbFNSII-1 ILDFFTAGTDTTAISTEWAI AELMNNPKVLKKAQEEIQKVVGSCRLMDESAPNLPYLEA
SbFNSII-2 ILDFLTAGTDTTAITVEWVLAELMNSPKAMKKAQDEMVRVGRERMMAESDAPNLPYFLA
          ****:*:*:*:* * * : * * * * * * * * * * * * * * * * * * * * * * *

CYP93B6 LIKETFRLHPPIPMLARKSISDCVIDGYMIPANTLLFVNLWSMGRNPKIWDYPTAFQPER
SbFNSII-1 IIKETFRLHPPIPMLARKSVSDCVIDGYNIPASTLLFVNIWSIGRNPECWDSPPFSFRPER
SbFNSII-2 IIKETFRLHPPIPLIIRRSIEDCVIDGYHIPADTLAFINVWSMGRNEKYWDSPLSFRPER
          :*****:*:*:*:*:*:* *:*:*:*:*:* * * * * * * * * * * * * * * * *

CYP93B6 FLEKEKAAIDVKGQHFELLPFGTGRRGCPGMLLAIQEVVIGTMIQCFDWKLPDGSGHV
SbFNSII-1 FFEKDNASIDIKGQHFQLLPFGTGRRGCPGMLLAIQELLLIIGTMIQCFDWELPEGSGPV
SbFNSII-2 FLEGDNAIDIKGMHFELLPFGSGRRGCPGMLSAIQEVLIIAGTVIQCFDWEQADGSGRV
          *:* : *:*:*:* * * * * * * * * * * * * * * * * * * * * * * *

CYP93B6 DMAERPGLTAPRETDLFCRVVPRVDPLVSTQ
SbFNSII-1 DMTERAGLTAPRAEDLICRVSCRVDPKIVF--
SbFNSII-2 DMSERPGLTTPREIDLVCRVVPRVDERVISGH
          **:*:*:*:* * * * * * * * * * * * * * * * * * * * * * * *
```

fig. S1. Multiple alignment of CPY93B6, CPY93B24, and CPY93B25.

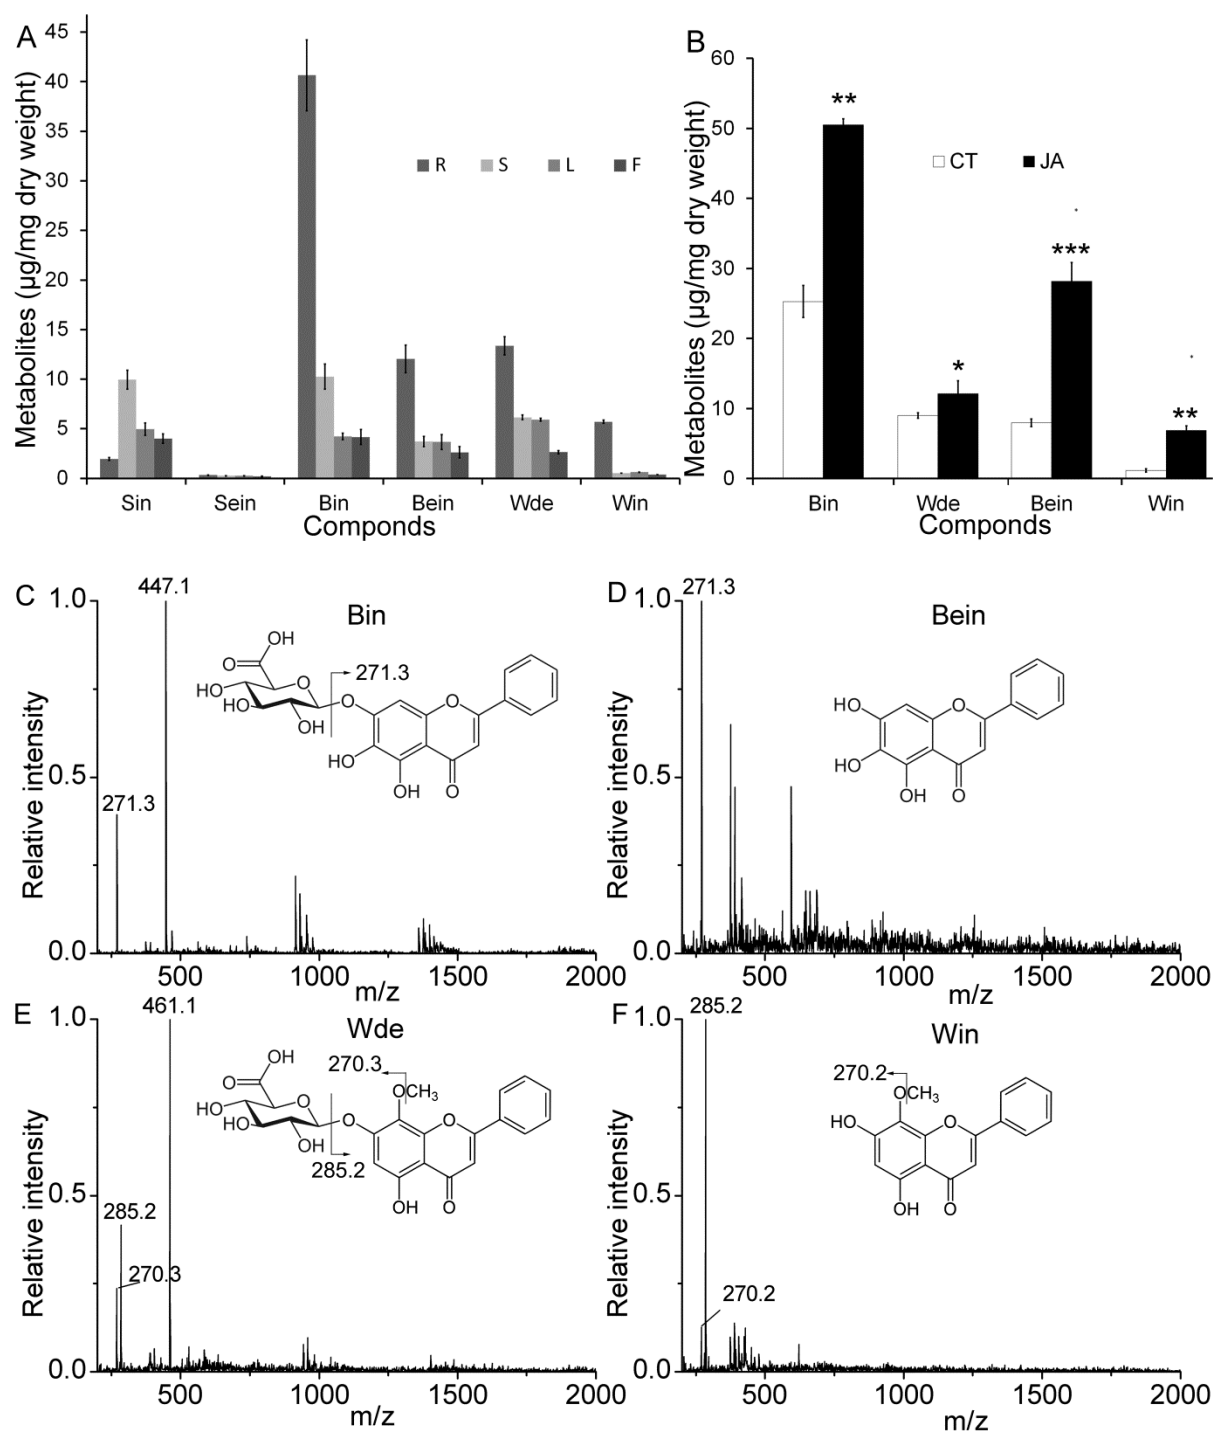

**fig. S2. Flavone accumulation patterns in *S. baicalensis*.** (A) Measurements of flavones from different organs of 6 month old *Scutellaria* plants. R, roots; S, stem; L, leaves; F, flowers. (B) Measurements of *Scutellaria* RSFs from hairy root lines subjected to MeJA treatment for 24h and MS profiles of baicalin (C), baicalein (D), wogonoside (E) and wogonin (F). Baicalin (bin), baicalein (bein), wogonoside (wde) and wogonin (win). SEs were calculated from 3 biological replicates. Differences were considered significant (Student's *t*-test) with \* $P < 0.05$ , \*\* $P < 0.01$ , \*\*\* $P < 0.001$ .

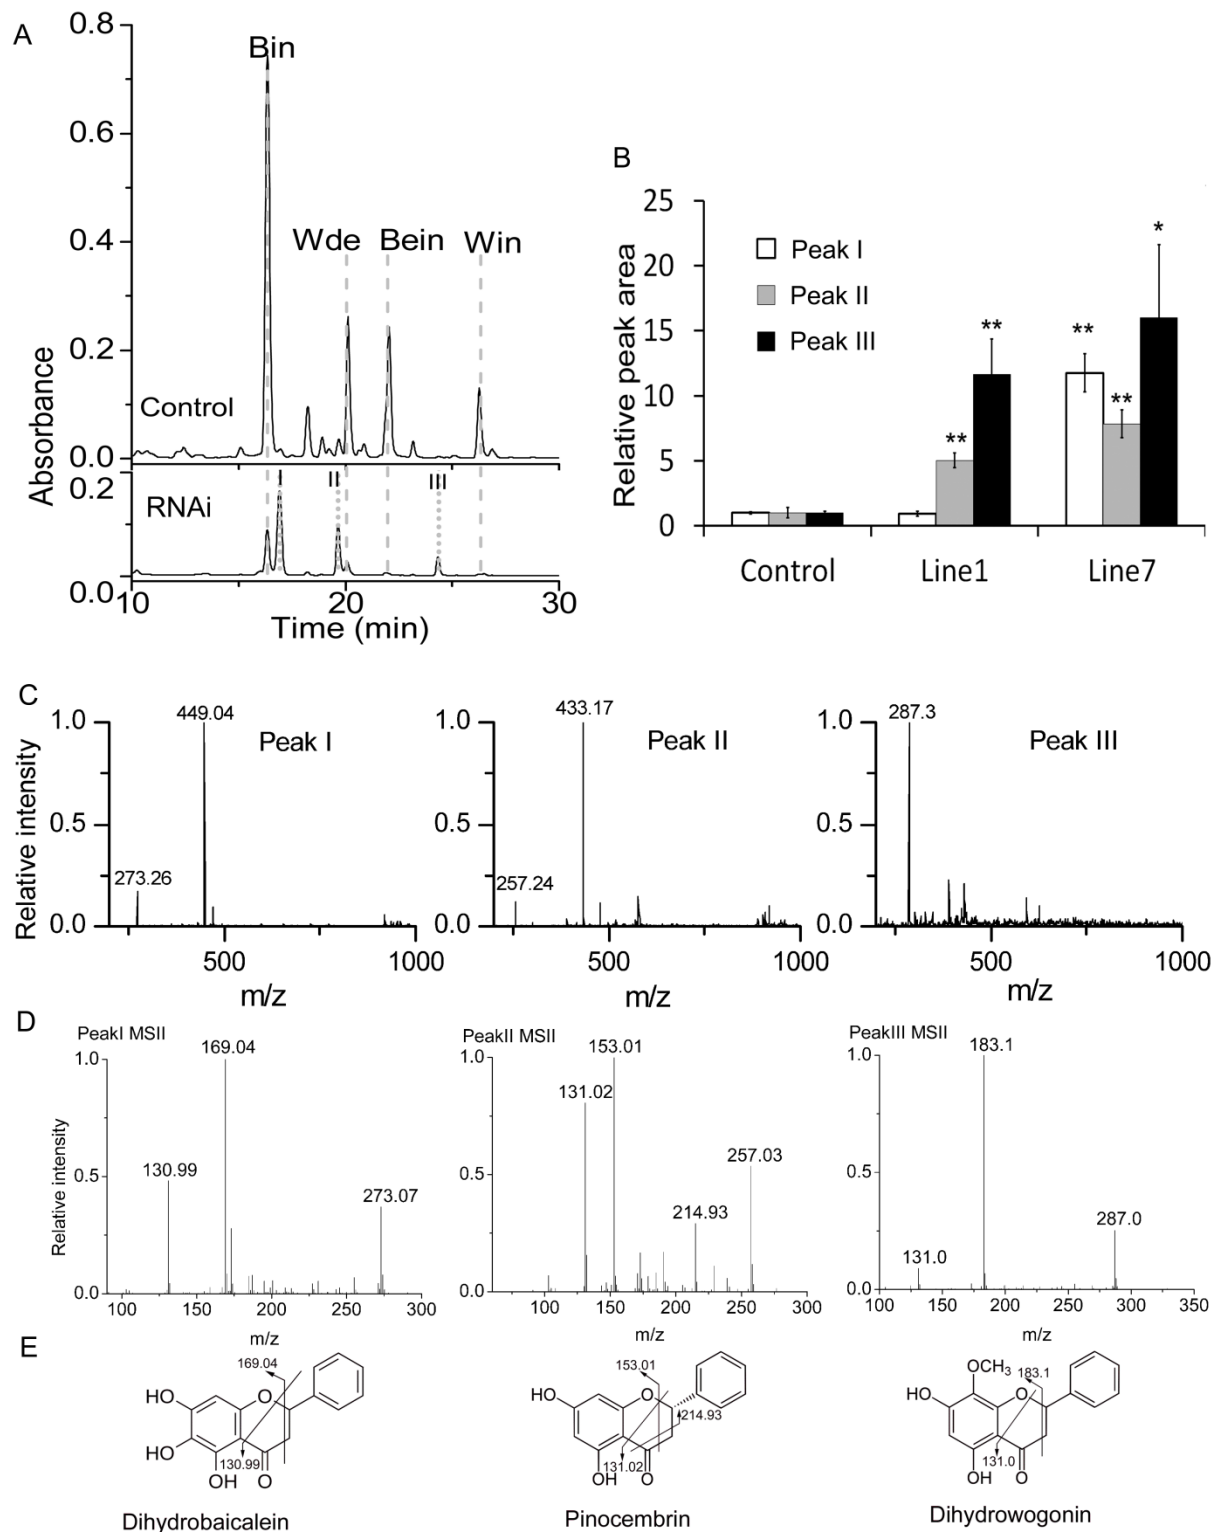

**fig. S3. RNAi of *SbFNS II-2* in hairy root cultures of *S. baicalensis*.** (A) HPLC profiles of flavone metabolites in *SbFNSII-2*-silenced hairy root lines compared with the profiles obtained from hairy roots transformed with an empty vector as control. Bin, baicalin; Wde, wogonoside; Bein, baicalein; Win, wogonin. (B) Relative area of the three new peaks in *SbFNSII-2* RNAi lines. SEs were

calculated from 3 biological replicates. Significant differences were considered with \* $P < 0.05$ , \*\* $P < 0.01$ . (C) MS I of peaks I, II and III detected from FNSII-2 RNAi lines (D) MS/MS of m/z 273.26, 257.24 and 287.30 detected from MS I. (E) Structures and fragmentation patterns for MS/MS of m/z 273.26, 257.24 and 287.30 detected from MS I



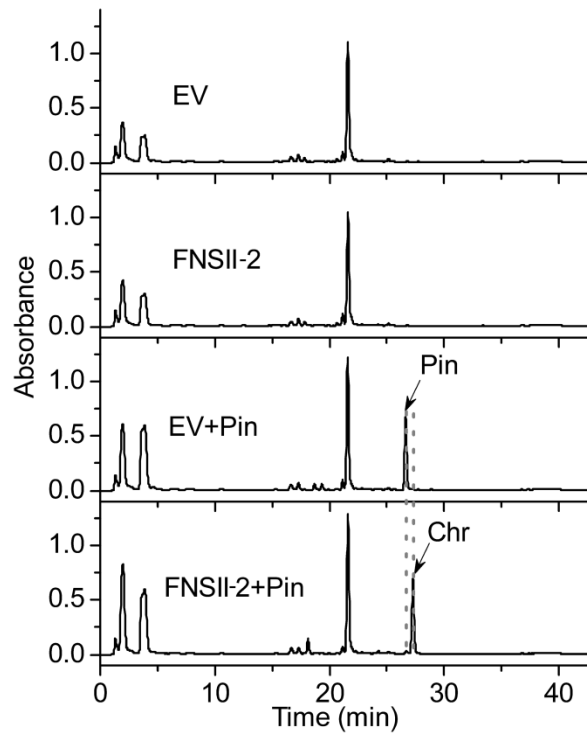

**fig. S5. HPLC metabolite profiles of *Arabidopsis* plants carrying empty vector or a representative *SbFNSII-2* line, grown on MS with or without supplementation of pinocembrin.**

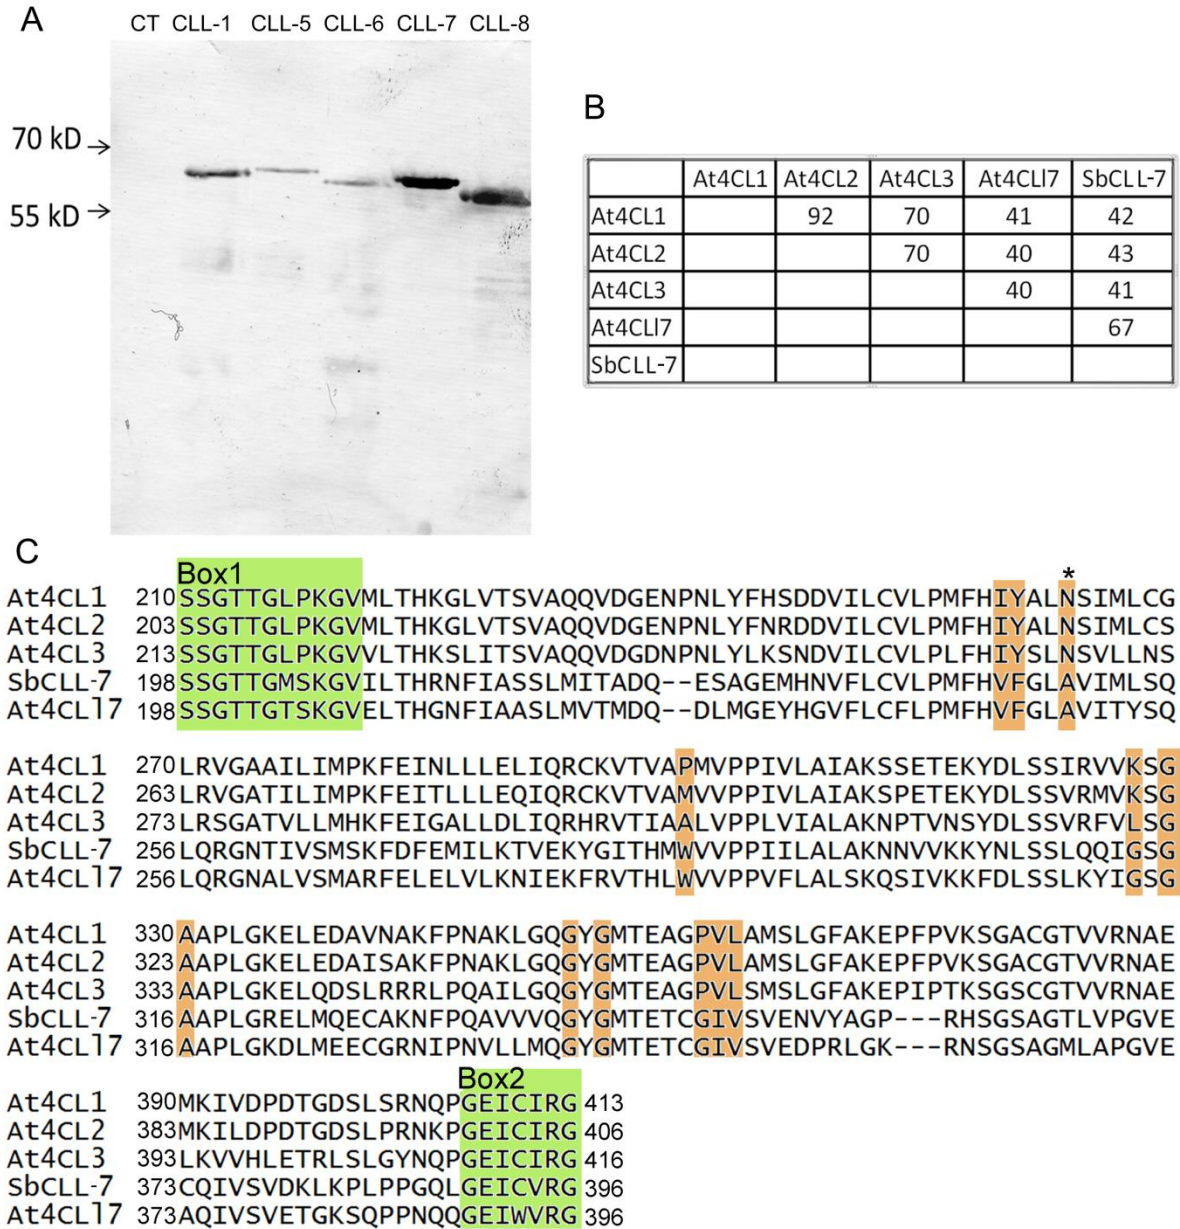

**fig. S6. Western blot analysis of the recombinant SbCLLs and SPB domain analysis of At4CLs and SbCLL-7.** (A) Five SbCLLs were expressed as fusion proteins with an N-terminal His<sub>6</sub>-tag in *E. coli*. The total proteins (10 µg each lane), were separated by SDS-PAGE, transferred to nitrocellulose membranes and probed with His-tag antibody. Protein extracts from bacteria containing the empty expression vector served as a control. Protein sizes are: SbCLL-1, 59.96 kD; SbCLL-5, 61.40 kD; SbCLL-6, 59.39 kD; SbCLL-7, 59.33 kD ; SbCLL-8, 56.12 kD. (B) The amino acid identity within the SPB domain of SbCLL-7 to 4CL-like proteins from *Arabidopsis thaliana*. (C) Multiple alignment of At4CL 1,2, 3, At4CL17 and SbCLL-7. \* Indicates Asn-256 of At4CL2 and Ala-249 of SbCLL-7 respectively.



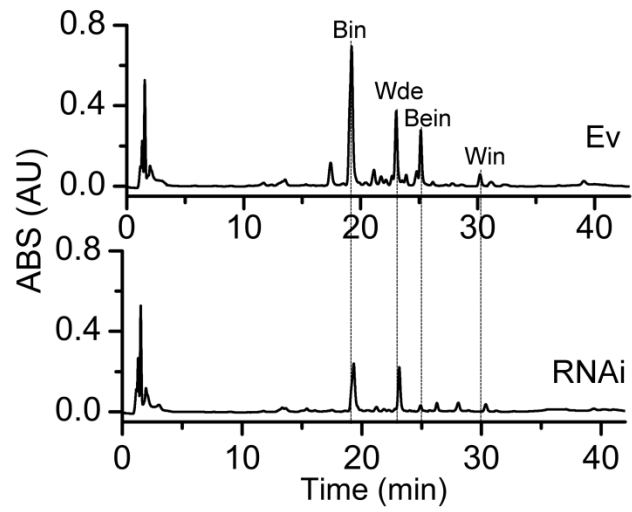

**fig. S7. Metabolite profiles by HPLC from empty vector line and a representative *SbCCL-7* RNAi line.**

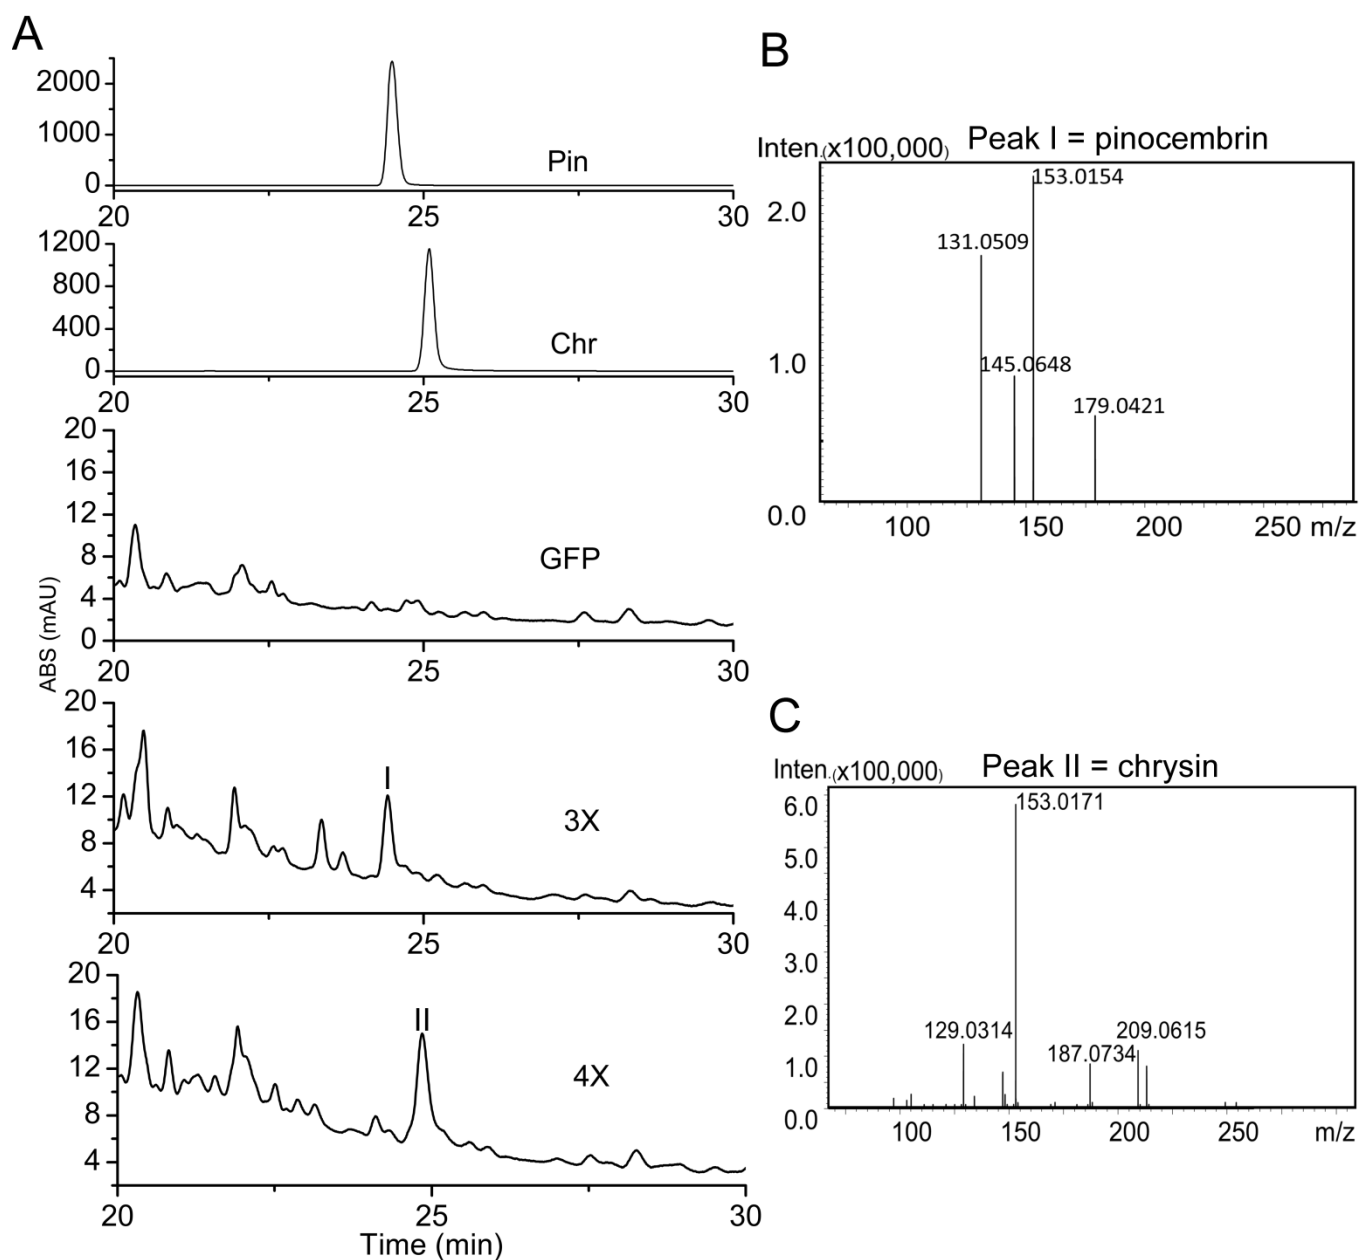

**fig. S8. Metabolite profiles of HPLC analysis of infiltrated *N. benthamiana* leaves.** (A) Metabolite profiles of infiltrated tobacco leaf without supplementation of cinnamate. Pin and Chr means pinocembrin and chrysin standards, respectively; GFP, *N. benthamiana* leaf infiltrated with GFP as a control; 3X, leaf infiltrated with *SbCLL-7*, *SbCHS-2* and *SbCHI*. 4X, leaf infiltrated with *SbCLL-7*, *SbCHS-2*, *SbCHI* and *SbFNSII-2*. (B) MS/MS of peak I, which was identical to the pinocembrin standard. (C) MS/MS of peak II, which was identical to the chrysin standard.

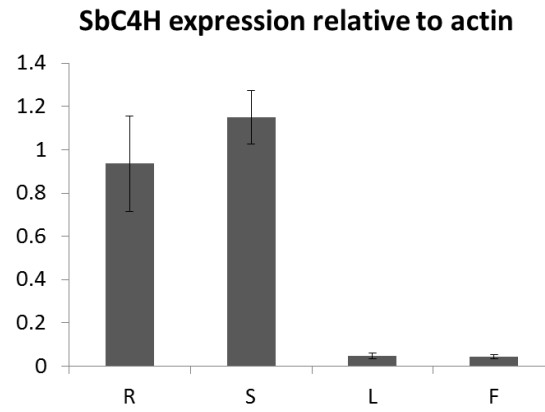

**fig. S9. Transcript levels of *SbC4H* relative to actin.** SEs were calculated from 3 independent biological replicates. R = roots, S = stems, L = leaves, F = flowers.

**table S1. Primers used in this study.** Underlined sequences mean recombination sites for Gateway cloning.

| Names            | Used for | Sequences                                                           |
|------------------|----------|---------------------------------------------------------------------|
| AP               | 3'RACE   | GGCACGCGTCGACTAGTACT[T] <sub>16</sub>                               |
| 3'RACE AUAP      | 3'RACE   | GGCCACGCGTCGACTAGTAC                                                |
| SbFNSIII GSP 1   | 3'RACE   | GCTGGAAAAGATTATCACCGACAG                                            |
| SbFNSIII GSP 2   | 3'RACE   | CCAGAAAGTGGTGGGATCTTGTAG                                            |
| SbFNSIII SP1     | 5'RACE   | GCAAATCGAAGTTCTTACAGAACCAG                                          |
| SbFNSIII SP2     | 5'RACE   | GCAAATCGAAGTTCTTACAGAACCAG                                          |
| SbFNSIII SP3     | 5'RACE   | GATTCGCTCTTCTCCATGAGAAGC                                            |
| FNSIII CDS F     | Cloning  | <u>GGGGACAAGTTTGTACAAAAAAGCAGGCTTC</u><br>ATGGACTTAGTAGAAGTCACAC    |
| FNSIII CDS R     | Cloning  | <u>GGGGACCACTTTGTACAAGAAAGCTGGGTTCTAGAAAAC</u><br>AATTTTCGGGTCAACC  |
| FNSIII QPCR F    | QPCR     | AAACCAACGAGCTGGTGTTC                                                |
| FNSIII QPCR R    | QPCR     | CGGAGAAAAGTGTGGACCTC                                                |
| SbFNSIII RNAi F  | RNAi     | <u>GGGGACAAGTTTGTACAAAAAAGCAGGCTTACTTCTCAT</u><br>GGAGAAGAGCGAATC   |
| SbFNSIII RNAi R  | RNAi     | <u>GGGGACCACTTTGTACAAGAAAGCTGGGTAACAAGATCC</u><br>CACCACTTTCTGG     |
| SbFNSII 2 CDS F  | Cloning  | <u>GGGGACAAGTTTGTACAAAAAAGCAGGCTTCCCGATGGA</u><br>AGTCACACTGAATGTGG |
| SbFNSII 2 CDS R  | Cloning  | <u>GGGGACCACTTTGTACAAGAAAGCTGGGTA</u> CTCTCCATA<br>AAAGCAGCAGCAACAG |
| Sb FNSII2 RNAi F | RNAi     | <u>GGGGACAAGTTTGTACAAAAAAGCAGGCTTAGATGTGAT</u><br>GGCTATGGGGAAGG    |
| Sb FNSII2 RNAi R | RNAi     | <u>GGGGACCACTTTGTACAAGAAAGCTGGGTA</u> CTCTCTTCC<br>AACCACTCTGTCC    |
| SbFNSII 2 QPCR F | QPCR     | TCACCTATGGCGTCTCCTTC                                                |
| SbFNSII 2 QPCR R | QPCR     | CAGCTCCTCAGTGACGTTGA                                                |
| SbCLL1 F         | Cloning  | <u>GGGGACAAGTTTGTACAAAAAAGCAGGCTTCATGGAGA</u><br>CTGTAGAAAACCACG    |
| SbCLL1 R         | Cloning  | <u>GGGGACCACTTTGTACAAGAAAGCTGGGTTTCAATTTGA</u>                      |

|               |         |                                                                       |
|---------------|---------|-----------------------------------------------------------------------|
|               |         | AAGAGTAGCTGCTTTTG                                                     |
| SbCLL5 F      | Cloning | <u>GGGGACAAGTTTGTACAAAAAAGCAGGCTTCATGTTGTC</u><br>GGTGGCCTCCGTG       |
| SbCLL5 R      | Cloning | <u>GGGGACCACTTTGTACAAGAAAGCTGGGTTTAAGATGA</u><br>GGATGGTGGAGTAGCAG    |
| SbCLL6 F      | Cloning | <u>GGGGACAAGTTTGTACAAAAAAGCAGGCTTCATGGCGG</u><br>AATTGATAGATCCACACAG  |
| SbCLL6 R      | Cloning | <u>GGGGACCACTTTGTACAAGAAAGCTGGGTTCTTCACATC</u><br>TTGGAGAGAGCAAGC     |
| SbCCL7 F      | Cloning | <u>GGGGACAAGTTTGTACAAAAAAGCAGGCTTCATGGAGA</u><br>AATCGGGCTATGG        |
| SbCCL7 R      | Cloning | <u>GGGGACCACTTTGTACAAGAAAGCTGGGTTTTATAACTT</u><br>CGATCGGACCTTTTC     |
| SbCCL8 F      | Cloning | <u>GGGGACAAGTTTGTACAAAAAAGCAGGCTTCATGTCTAT</u><br>TTCAACCCTAACCGGTTTG |
| SbCCL8 R      | Cloning | <u>GGGGACCACTTTGTACAAGAAAGCTGGGTTTTAAGCTCC</u><br>AAACTTAGGGACCTTAGC  |
| SbCCL1 F      | QPCR    | ATAATCAAGTACAAAGGGTTCCA                                               |
| SbCCL1 R      | QPCR    | ACCTGTTTGGATATAAATTGCTT                                               |
| SbCCL5 F      | QPCR    | TGGAAACCCAGAATCCAGAG                                                  |
| SbCCL5 R      | QPCR    | GTTTCCGACAAAGAGGCAAG                                                  |
| SbCCL7 F      | QPCR    | ATTGAGGCCACCGTTGTATC                                                  |
| SbCCL7 R      | QPCR    | CGACTTTTGAAACCGTGGAT                                                  |
| SbCCL7 RNAi F | RNAi    | <u>GGGGACAAGTTTGTACAAAAAAGCAGGCTTCCCATGGTT</u><br>TACTTCAACTGG        |
| SbCCL7 RNAi R | RNAi    | <u>GGGGACCACTTTGTACAAGAAAGCTGGGTTGCAGCTGTA</u><br>TCATCTTGCTTG        |
| SbCHS1 CDS F  | Cloning | <u>GGGGACAAGTTTGTACAAAAAAGCAGGCTTCATGGTGAG</u><br>CGTCGAAGAGTTC       |
| SbCHS1 CDS R  | Cloning | <u>GGGGACCACTTTGTACAAGAAAGCTGGGTTTTAGTTGAG</u><br>AGGCACACTACGAAG     |
| SbCHS1 QPCR F | QPCR    | AACTGCCTCCACCAGTCCACC                                                 |
| SbCHS1 QPCR R | QPCR    | GTCAACATCTCCTGCCTGACG                                                 |
| SbCHS2 CDS F  | Cloning | <u>GGGGACAAGTTTGTACAAAAAAGCAGGCTTCATGGTGAC</u><br>AGTTGAAGAATTCCAC    |

|               |         |                                                                   |
|---------------|---------|-------------------------------------------------------------------|
| SbCHS2 CDS R  | Cloning | <u>GGGGACCACTTTGTACAAGAAAGCTGGGTTTCAATTGAG</u><br>AGGCACACTATGC   |
| SbCHS2 QPCR F | QPCR    | GCAGTCCAATTATGCTGATTAC                                            |
| SbCHS2 QPCR R | QPCR    | GTGAAGTTGTCGTTCTCCTTC                                             |
| SbCHI CDS F   | Cloning | <u>GGGGACAAGTTTGTACAAAAAAGCAGGCTTCATGTCTGC</u><br>TTCGCCATCCGT    |
| SbCHI CDS R   | Cloning | <u>GGGGACCACTTTGTACAAGAAAGCTGGGTTTTAAAACAA</u><br>CTCCGATAGTCTTGC |
| SbCHI QPCR F  | QPCR    | AAGGCAGTAATAGAGAACAAACAG                                          |
| SbCHI QPCR R  | QPCR    | TTAAAACAACCTCCGATAGTCTTG                                          |
| SbC4H F       | QPCR    | GCCGATTCTCTGTATCACTATC                                            |
| SbC4H R       | QPCR    | ATGATTAAAATGATCTTGGCTTT                                           |
